# Supplementary material for: Theoretical exploration of molecular packing and the charge transfer mechanism of organic solar cells based on PM6:Y6
Source: Royal Society of Chemistry journal article supplement (doi:10.1039/d2ta07420f), 2022-01-01
Supplement: d2ta07420f1.pdf [file d2ta07420f1.pdf]

## Supporting Information

# Theoretical exploration on molecular packing and charge transfer mechanism of organic solar cells based on PM6:Y6

Chongchen Xiang,<sup>†a</sup> Qiming Zhao,<sup>†a</sup> Wanqiang Liu,<sup>\*a</sup> Jiamin Cao,<sup>a</sup> Yingping Zou,<sup>b</sup> and Hu Zhou<sup>\*a</sup>

a. School of Chemistry and Chemical Engineering, Hunan Province Key Laboratory of Controllable Preparation and Functional

Application of Fine Polymers, Hunan University of Science and Technology, Xiangtan 411201, China

b. College of Chemistry and Chemical Engineering, Central South University, Changsha 410083, China

\*E-mail: wanqiangliu@hnust.edu.cn (W Liu); Zhouhu2006@163.com (H Zhou)

**Table S1** Vertical excitation energy( $E/eV$ ), excitation wavelength( $\lambda/nm$ ) and oscillator intensity( $f$ ) of the first twenty excited states of Dimer-1

| Dimer-1         | $E/eV$ | $\lambda/nm$ | $f$    |                 | $E/eV$ | $\lambda/nm$ | $f$    |
|-----------------|--------|--------------|--------|-----------------|--------|--------------|--------|
| S <sub>1</sub>  | 1.3362 | 927.90       | 0.0017 | S <sub>11</sub> | 2.0072 | 617.69       | 0.0232 |
| S <sub>2</sub>  | 1.4221 | 871.82       | 0.0045 | S <sub>12</sub> | 2.0236 | 612.69       | 0.0027 |
| S <sub>3</sub>  | 1.5675 | 790.98       | 0.0017 | S <sub>13</sub> | 2.0264 | 611.83       | 0.0197 |
| S <sub>4</sub>  | 1.6369 | 757.42       | 0.9465 | S <sub>14</sub> | 2.0613 | 601.50       | 0.0002 |
| S <sub>5</sub>  | 1.6507 | 751.08       | 0.0034 | S <sub>15</sub> | 2.0708 | 598.73       | 0.0032 |
| S <sub>6</sub>  | 1.8032 | 687.57       | 0.0010 | S <sub>16</sub> | 2.1096 | 587.72       | 0.0266 |
| S <sub>7</sub>  | 1.8252 | 679.30       | 0.8509 | S <sub>17</sub> | 2.1160 | 585.95       | 0.0022 |
| S <sub>8</sub>  | 1.8402 | 673.74       | 0.0006 | S <sub>18</sub> | 2.1200 | 584.82       | 0.0307 |
| S <sub>9</sub>  | 1.8784 | 660.04       | 0.5571 | S <sub>19</sub> | 2.1644 | 572.84       | 0.0891 |
| S <sub>10</sub> | 1.9906 | 622.84       | 0.1214 | S <sub>20</sub> | 2.1750 | 570.06       | 0.0187 |

**Table S2** Vertical excitation energy( $E/eV$ ), excitation wavelength( $\lambda/nm$ ) and oscillator intensity( $f$ ) of the first twenty excited states of Dimer-2

| Dimer-2         | $E/eV$ | $\lambda/nm$ | $f$    |                 | $E/eV$ | $\lambda/nm$ | $f$    |
|-----------------|--------|--------------|--------|-----------------|--------|--------------|--------|
| S <sub>1</sub>  | 1.4010 | 884.97       | 0.0021 | S <sub>11</sub> | 2.0030 | 618.98       | 0.0014 |
| S <sub>2</sub>  | 1.5347 | 807.85       | 0.0187 | S <sub>12</sub> | 2.0635 | 600.86       | 0.2232 |
| S <sub>3</sub>  | 1.6638 | 745.20       | 0.0737 | S <sub>13</sub> | 2.0758 | 597.28       | 0.0196 |
| S <sub>4</sub>  | 1.7083 | 725.76       | 0.0507 | S <sub>14</sub> | 2.0946 | 591.93       | 0.0047 |
| S <sub>5</sub>  | 1.7491 | 708.87       | 0.1443 | S <sub>15</sub> | 2.1040 | 589.27       | 0.0046 |
| S <sub>6</sub>  | 1.8079 | 685.81       | 0.4248 | S <sub>16</sub> | 2.1224 | 584.18       | 0.0341 |
| S <sub>7</sub>  | 1.8342 | 675.97       | 1.3623 | S <sub>17</sub> | 2.1281 | 582.61       | 0.0183 |
| S <sub>8</sub>  | 1.8735 | 661.79       | 0.3332 | S <sub>18</sub> | 2.1616 | 573.58       | 0.0881 |
| S <sub>9</sub>  | 1.8968 | 653.64       | 0.0815 | S <sub>19</sub> | 2.1978 | 564.14       | 0.0104 |
| S <sub>10</sub> | 1.9295 | 642.58       | 0.5797 | S <sub>20</sub> | 2.2356 | 554.58       | 0.0020 |

**Table S3** Vertical excitation energy( $E/eV$ ), excitation wavelength( $\lambda/nm$ ) and oscillator intensity( $f$ ) of the first twenty excited states of Dimer-3

| Dimer-3         | $E/eV$ | $\lambda/nm$ | $f$    |                 | $E/eV$ | $\lambda/nm$ | $f$    |
|-----------------|--------|--------------|--------|-----------------|--------|--------------|--------|
| S <sub>1</sub>  | 1.2166 | 1019.13      | 0.0061 | S <sub>11</sub> | 1.9479 | 636.50       | 0.0812 |
| S <sub>2</sub>  | 1.4094 | 879.68       | 0.0121 | S <sub>12</sub> | 1.9634 | 631.46       | 0.1150 |
| S <sub>3</sub>  | 1.5419 | 804.08       | 0.0080 | S <sub>13</sub> | 1.9991 | 620.19       | 0.0305 |
| S <sub>4</sub>  | 1.6273 | 761.90       | 0.5684 | S <sub>14</sub> | 2.0235 | 607.51       | 0.0822 |
| S <sub>5</sub>  | 1.6570 | 748.23       | 0.3998 | S <sub>15</sub> | 2.0427 | 606.96       | 0.2030 |
| S <sub>6</sub>  | 1.7229 | 719.63       | 1.6724 | S <sub>16</sub> | 2.0427 | 606.96       | 0.2030 |
| S <sub>7</sub>  | 1.7326 | 715.61       | 0.0715 | S <sub>17</sub> | 2.0569 | 602.78       | 0.0071 |
| S <sub>8</sub>  | 1.7616 | 703.81       | 0.0536 | S <sub>18</sub> | 2.0747 | 597.59       | 0.1775 |
| S <sub>9</sub>  | 1.8149 | 683.15       | 0.0114 | S <sub>19</sub> | 2.1646 | 572.77       | 0.1369 |
| S <sub>10</sub> | 1.8599 | 666.61       | 0.1068 | S <sub>20</sub> | 2.1963 | 564.51       | 0.0254 |

**Table S4** Vertical excitation energy( $E/eV$ ), excitation wavelength( $\lambda/nm$ ) and oscillator intensity( $f$ ) of the first twenty excited states of Dimer-4

| Dimer-4         | $E/eV$ | $\lambda/nm$ | $f$    |                 | $E/eV$ | $\lambda/nm$ | $f$    |
|-----------------|--------|--------------|--------|-----------------|--------|--------------|--------|
| S <sub>1</sub>  | 1.3038 | 950.95       | 0.0005 | S <sub>11</sub> | 2.0217 | 613.26       | 0.0002 |
| S <sub>2</sub>  | 1.4561 | 851.49       | 0.0006 | S <sub>12</sub> | 2.0538 | 603.67       | 0.1244 |
| S <sub>3</sub>  | 1.6237 | 763.58       | 0.0003 | S <sub>13</sub> | 2.0633 | 600.90       | 0.2817 |
| S <sub>4</sub>  | 1.7587 | 704.98       | 0.0069 | S <sub>14</sub> | 2.0714 | 598.54       | 0.0105 |
| S <sub>5</sub>  | 1.7747 | 698.63       | 0.0294 | S <sub>15</sub> | 2.0817 | 595.58       | 0.0492 |
| S <sub>6</sub>  | 1.8072 | 686.06       | 2.7824 | S <sub>16</sub> | 2.1499 | 576.70       | 0.0004 |
| S <sub>7</sub>  | 1.8346 | 675.80       | 0.4801 | S <sub>17</sub> | 2.2195 | 558.62       | 0.0009 |
| S <sub>8</sub>  | 1.8635 | 665.35       | 0.0002 | S <sub>18</sub> | 2.2458 | 552.08       | 0.1973 |
| S <sub>9</sub>  | 1.9835 | 625.07       | 0.0000 | S <sub>19</sub> | 2.2516 | 550.65       | 0.0003 |
| S <sub>10</sub> | 1.9911 | 622.71       | 0.0001 | S <sub>20</sub> | 2.2536 | 550.15       | 0.0682 |

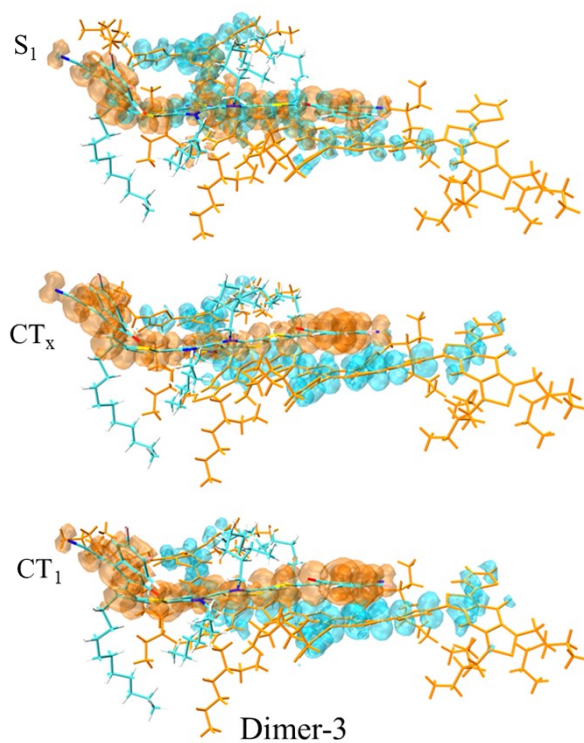

**Figure S1.** The hole-electron (blue-orange) density distribution of S<sub>1</sub> state, CT<sub>x</sub> state, and CT<sub>1</sub> state of Dimer-3.

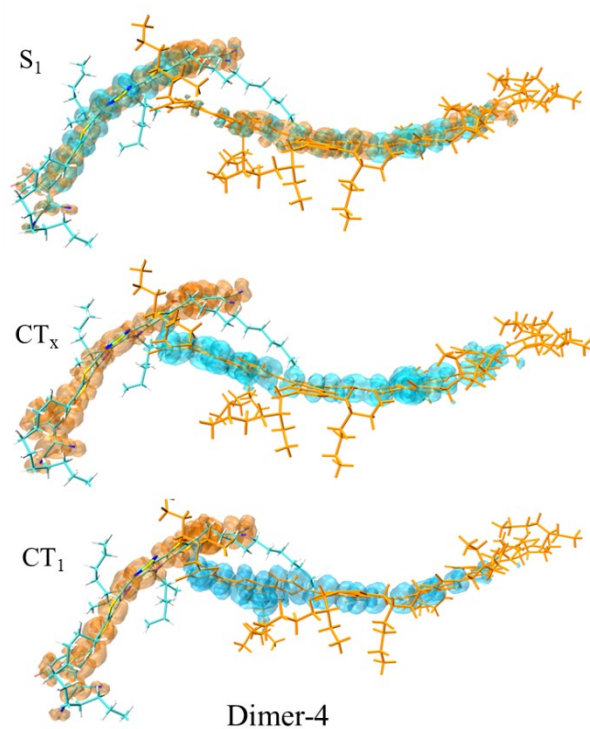

**Figure S2.** The hole-electron (blue-orange) density distribution of  $S_1$  state,  $CT_x$  state, and  $CT_1$  state of Dimer-4.

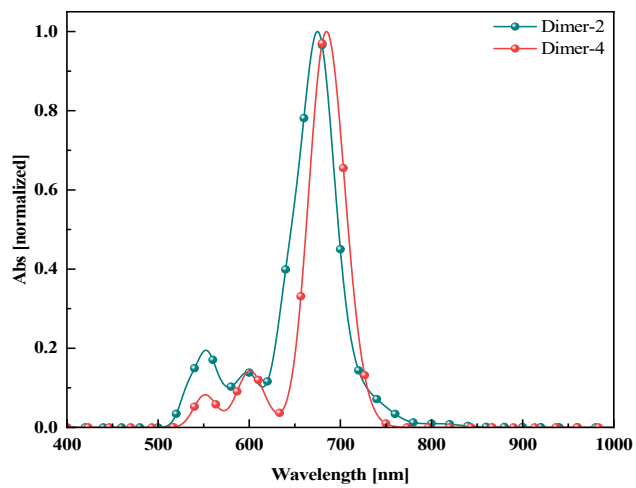

**Figure S3.** UV-Vis spectroscopy of Dimer-2 and Dimer-4.

**Table S5** Electron transfer recombination energy( $\lambda_{\text{electron}}/\text{eV}$ ), electron transfer Gibbs free energy( $\Delta G_{\text{electron}}/\text{eV}$ ), electron transfer rates( $k_{\text{CT-electron}}/\text{s}^{-1}$ ), hole transfer recombination energy( $\lambda_{\text{hole}}/\text{eV}$ ), hole transfer Gibbs free energy( $\Delta G_{\text{hole}}/\text{eV}$ ), hole transfer rates( $k_{\text{CT-hole}}/\text{s}^{-1}$ ) for the first seven excited states of Dimer-1

| Dimer-1         | $\lambda_{\text{electron}}/\text{eV}$ | $\Delta G_{\text{electron}}/\text{eV}$ | $k_{\text{CT-electron}}/\text{s}^{-1}$ | $\lambda_{\text{hole}}/\text{eV}$ | $\Delta G_{\text{hole}}/\text{eV}$ | $k_{\text{CT-hole}}/\text{s}^{-1}$ |
|-----------------|---------------------------------------|----------------------------------------|----------------------------------------|-----------------------------------|------------------------------------|------------------------------------|
| CT <sub>1</sub> | 0.9804                                | -0.5340                                | $2.68 \times 10^{11}$                  | 0.8808                            | -0.2805                            | $3.82 \times 10^{10}$              |
| CT <sub>2</sub> | 0.9804                                | -0.6539                                | $1.15 \times 10^{12}$                  | 0.8808                            | -0.4636                            | $5.11 \times 10^{11}$              |
| CT <sub>3</sub> | 0.9804                                | -0.5438                                | $2.67 \times 10^{11}$                  | 0.8808                            | -0.6236                            | $8.98 \times 10^{11}$              |
| S <sub>1</sub>  | 0.9804                                | -0.5706                                | $1.74 \times 10^{15}$                  | 0.8808                            | -0.6393                            | $5.09 \times 10^{15}$              |
| CT <sub>4</sub> | 0.9804                                | -0.5830                                | $7.63 \times 10^{11}$                  | 0.8808                            | -0.6828                            | $2.50 \times 10^{12}$              |
| S <sub>2</sub>  | 0.9804                                | -0.5528                                | $4.64 \times 10^{10}$                  | 0.8808                            | -0.6399                            | $1.58 \times 10^{11}$              |
| S <sub>3</sub>  | 0.9804                                | -0.5682                                | $1.60 \times 10^{15}$                  | 0.8808                            | -0.6541                            | $5.17 \times 10^{15}$              |

**Table S6** Electron transfer recombination energy( $\lambda_{\text{electron}}/\text{eV}$ ), electron transfer Gibbs free energy( $\Delta G_{\text{electron}}/\text{eV}$ ), electron transfer rates( $k_{\text{CT-electron}}/\text{s}^{-1}$ ), hole transfer recombination energy( $\lambda_{\text{hole}}/\text{eV}$ ), hole transfer Gibbs free energy( $\Delta G_{\text{hole}}/\text{eV}$ ), hole transfer rates( $k_{\text{CT-hole}}/\text{s}^{-1}$ ) for the first seven excited states of Dimer-2

| Dimer-2         | $\lambda_{\text{electron}}/\text{eV}$ | $\Delta G_{\text{electron}}/\text{eV}$ | $k_{\text{CT-electron}}/\text{s}^{-1}$ | $\lambda_{\text{hole}}/\text{eV}$ | $\Delta G_{\text{hole}}/\text{eV}$ | $k_{\text{CT-hole}}/\text{s}^{-1}$ |
|-----------------|---------------------------------------|----------------------------------------|----------------------------------------|-----------------------------------|------------------------------------|------------------------------------|
| CT <sub>1</sub> | 1.0307                                | -0.4573                                | $8.46 \times 10^{11}$                  | 0.8562                            | -0.3343                            | $9.36 \times 10^{11}$              |
| CT <sub>2</sub> | 1.0307                                | -0.6054                                | $7.43 \times 10^{12}$                  | 0.8562                            | -0.4242                            | $5.39 \times 10^{12}$              |
| CT <sub>3</sub> | 1.0307                                | -0.5390                                | $2.31 \times 10^{13}$                  | 0.8562                            | -0.5207                            | $6.89 \times 10^{13}$              |
| CT <sub>4</sub> | 1.0307                                | -0.5806                                | $1.71 \times 10^{15}$                  | 0.8562                            | -0.6471                            | $7.73 \times 10^{15}$              |
| S <sub>1</sub>  | 1.0307                                | -0.5802                                | $1.77 \times 10^{15}$                  | 0.8562                            | -0.6415                            | $7.80 \times 10^{15}$              |
| S <sub>2</sub>  | 1.0307                                | -0.5826                                | $2.68 \times 10^{14}$                  | 0.8562                            | -0.6558                            | $1.24 \times 10^{15}$              |
| S <sub>3</sub>  | 1.0307                                | -0.5816                                | $1.17 \times 10^{15}$                  | 0.8562                            | -0.7121                            | $6.78 \times 10^{15}$              |

**Table S7** Electron transfer recombination energy( $\lambda_{\text{electron}}/\text{eV}$ ), electron transfer Gibbs free energy( $\Delta G_{\text{electron}}/\text{eV}$ ), electron transfer rates( $k_{\text{CT-electron}}/\text{s}^{-1}$ ), hole transfer recombination energy( $\lambda_{\text{hole}}/\text{eV}$ ), hole transfer Gibbs free energy( $\Delta G_{\text{hole}}/\text{eV}$ ), hole transfer rates( $k_{\text{CT-hole}}/\text{s}^{-1}$ ) for the first seven excited states of Dimer-3

| Dimer-3         | $\lambda_{\text{electron}}/\text{eV}$ | $\Delta G_{\text{electron}}/\text{eV}$ | $k_{\text{CT-electron}}/\text{s}^{-1}$ | $\lambda_{\text{hole}}/\text{eV}$ | $\Delta G_{\text{hole}}/\text{eV}$ | $k_{\text{CT-hole}}/\text{s}^{-1}$ |
|-----------------|---------------------------------------|----------------------------------------|----------------------------------------|-----------------------------------|------------------------------------|------------------------------------|
| CT <sub>1</sub> | 1.0121                                | -0.4537                                | $4.08 \times 10^{11}$                  | 0.8036                            | -0.4558                            | $2.12 \times 10^{12}$              |
| CT <sub>2</sub> | 1.0121                                | -0.5322                                | $1.04 \times 10^{12}$                  | 0.8036                            | -0.5700                            | $5.53 \times 10^{12}$              |
| CT <sub>3</sub> | 1.0121                                | -0.4858                                | $5.69 \times 10^{11}$                  | 0.8036                            | -0.6679                            | $7.32 \times 10^{12}$              |
| S <sub>1</sub>  | 1.0121                                | -0.5055                                | $3.07 \times 10^{14}$                  | 0.8036                            | -0.6895                            | $3.47 \times 10^{15}$              |
| S <sub>2</sub>  | 1.0121                                | -0.5770                                | $1.11 \times 10^{14}$                  | 0.8036                            | -0.7518                            | $7.46 \times 10^{14}$              |
| S <sub>3</sub>  | 1.0121                                | -0.5581                                | $1.37 \times 10^{15}$                  | 0.8036                            | -0.7891                            | $1.11 \times 10^{16}$              |
| S <sub>4</sub>  | 1.0121                                | -0.6556                                | $1.17 \times 10^{15}$                  | 0.8036                            | -0.8172                            | $4.45 \times 10^{15}$              |

**Table S8** Electron transfer recombination energy( $\lambda_{\text{electron}}/\text{eV}$ ), electron transfer Gibbs free energy( $\Delta G_{\text{electron}}/\text{eV}$ ), electron transfer rates( $k_{\text{CT-electron}}/\text{s}^{-1}$ ), hole transfer recombination energy( $\lambda_{\text{hole}}/\text{eV}$ ), hole transfer Gibbs free energy( $\Delta G_{\text{hole}}/\text{eV}$ ), hole transfer rates( $k_{\text{CT-hole}}/\text{s}^{-1}$ ) for the first seven excited states of Dimer-4

| Dimer-4         | $\lambda_{\text{electron}}/\text{eV}$ | $\Delta G_{\text{electron}}/\text{eV}$ | $k_{\text{CT-electron}}/\text{s}^{-1}$ | $\lambda_{\text{hole}}/\text{eV}$ | $\Delta G_{\text{hole}}/\text{eV}$ | $k_{\text{CT-hole}}/\text{s}^{-1}$ |
|-----------------|---------------------------------------|----------------------------------------|----------------------------------------|-----------------------------------|------------------------------------|------------------------------------|
| CT <sub>1</sub> | 1.0641                                | -0.4712                                | $1.37 \times 10^{10}$                  | 0.8496                            | -0.3998                            | $3.76 \times 10^{10}$              |
| CT <sub>2</sub> | 1.0641                                | -0.5376                                | $1.20 \times 10^{10}$                  | 0.8496                            | -0.5344                            | $5.44 \times 10^{10}$              |
| CT <sub>3</sub> | 1.0641                                | -0.4291                                | $1.63 \times 10^9$                     | 0.8496                            | -0.5623                            | $2.82 \times 10^{10}$              |
| CT <sub>4</sub> | 1.0641                                | -0.4312                                | $5.98 \times 10^{10}$                  | 0.8496                            | -0.5690                            | $1.06 \times 10^{12}$              |
| CT <sub>5</sub> | 1.0641                                | -0.4633                                | $4.00 \times 10^{11}$                  | 0.8496                            | -0.5583                            | $4.59 \times 10^{12}$              |
| S <sub>1</sub>  | 1.0641                                | -0.4619                                | $4.72 \times 10^{14}$                  | 0.8496                            | -0.7096                            | $1.16 \times 10^{16}$              |
| S <sub>2</sub>  | 1.0641                                | -0.5333                                | $2.95 \times 10^{14}$                  | 0.8496                            | -0.7592                            | $3.95 \times 10^{15}$              |
